# Supplementary material for: Synthesis of highly crystalline LaFeO3 nanospheres for phenoxazinone synthase mimicking activity
Source: Royal Society of Chemistry journal article supplement (doi:10.1039/d1ra02295d), 2021-01-01
Supplement: d1ra02295d1.pdf [file d1ra02295d1.pdf]

**Electronic Supporting information**

**Synthesis of highly crystalline LaFeO<sub>3</sub> nanospheres for  
phenoxazinone synthase mimicking activity**

Mohamed Khairy,\* Abdelrahman H. Mahmoud, and Kamal M. S. Khalil\*

Chemistry Department, Faculty of Science, Sohag University, 82524.

### **S1. Calculation of CB and VB potentials for LaFeO<sub>3</sub>.**

$$\text{La} \quad E_{\text{IE}} = 538.1 \text{ kJ/mol} \div 96.48 = 5.577 \text{ eV}$$

$$E_{\text{EA}} = 48 \text{ kJ/mol} \div 96.48 = 0.498 \text{ eV}$$

$$\chi_{\text{La}} = 1/2(5.577+0.498) = 3.0375 \text{ eV}$$

$$\text{Fe} \quad E_{\text{IE}} = 762.5 \text{ kJ/mol} \div 96.48 = 7.9 \text{ eV}$$

$$E_{\text{EA}} = 14.78 \text{ kJ/mol} \div 96.48 = 0.153 \text{ eV}$$

$$\chi_{\text{Fe}} = 1/2(7.9 \text{ eV} + 0.153) = 4.02 \text{ eV}$$

$$\text{O} \quad E_{\text{IE}} = 1313.9 \text{ kJ/mol} \div 96.48 = 13.618 \text{ eV}$$

$$E_{\text{EA}} = 140.97 \text{ kJ/mol} \div 96.48 = 1.461 \text{ eV}$$

$$\chi_{\text{O}} = 1/2(13.618+1.461) = 7.54 \text{ eV}$$

$$\chi_{\text{LaFeO}_3} = (3.0375 \times 4.02 \times (7.54)^3)^{1/5} = 5.54 \text{ eV}$$

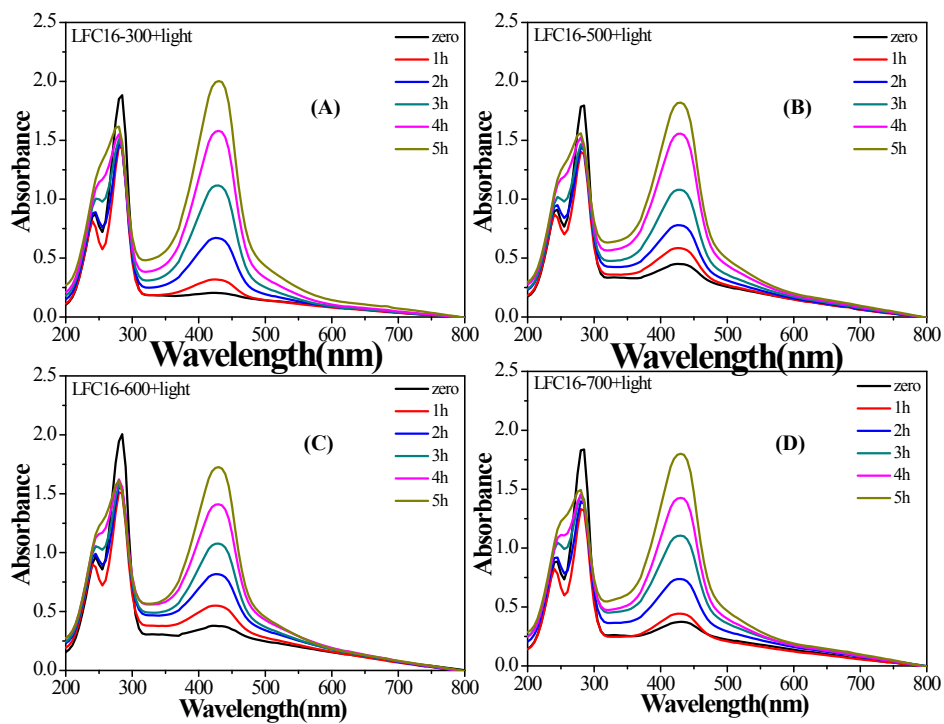

**Figure S2.** UV/Vis spectra of photocatalytic conversion of OAP over LFC16 at different calcination temperatures (A) 300 °C, (B) 500 °C, (C) 600 °C, and (D) 700 °C in ethanoic solution under nitrogen atmosphere.

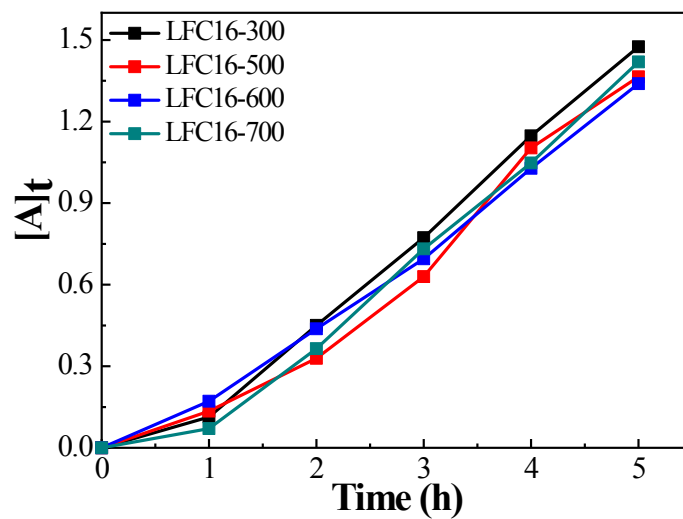

**Figure S3.** Analysis of absorbance time dependence in ethanol/water under nitrogen atmosphere using  $\text{LaFeO}_3$  synthesized at different annealing temperatures under solar irradiation.

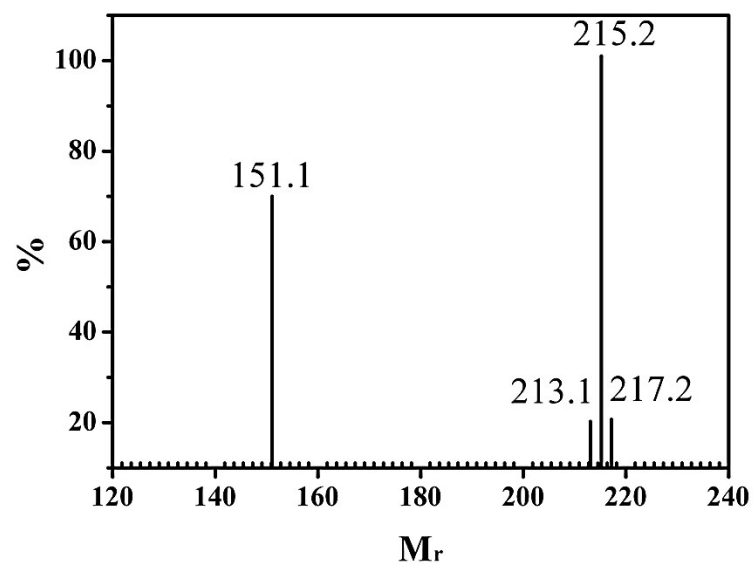

**Figure S4.** Mass spectra of isolated oxidation reaction products of *o*-aminophenol.

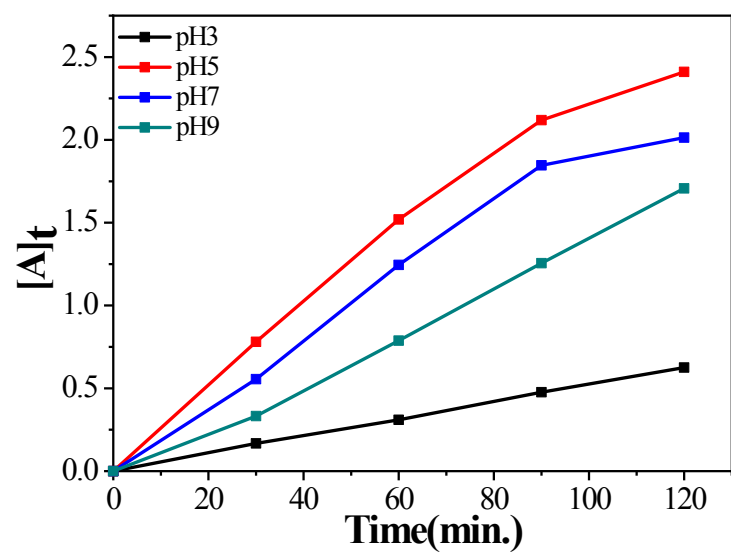

**Figure S5.** Effect of solution pH on the photocatalytic conversion of OAP to APX over LFC4 in acetonitrile/water solvent under nitrogen atmosphere under solar irradiation.

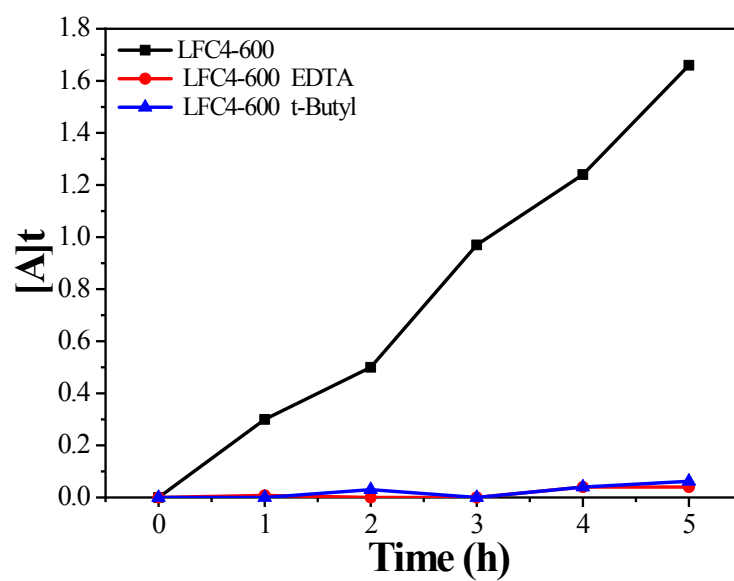

**Figure S6.** Effect of scavenger on the photocatalytic conversion of OAP to APX over LFC4-600 in acetonitrile/water solvent under nitrogen atmosphere under solar irradiation.

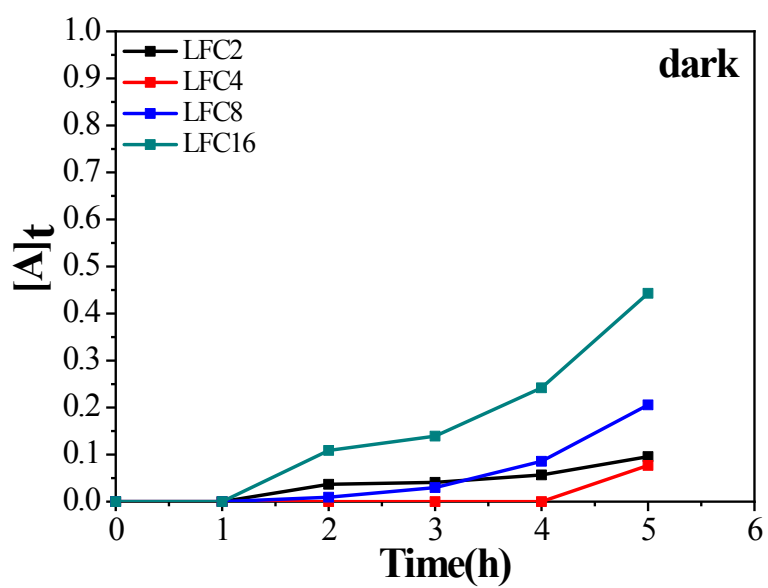

**Figure S7.** Analysis of absorbance time dependence in acetonitrile/water under nitrogen atmosphere using  $\text{LaFeO}_3$  synthesized in dark.



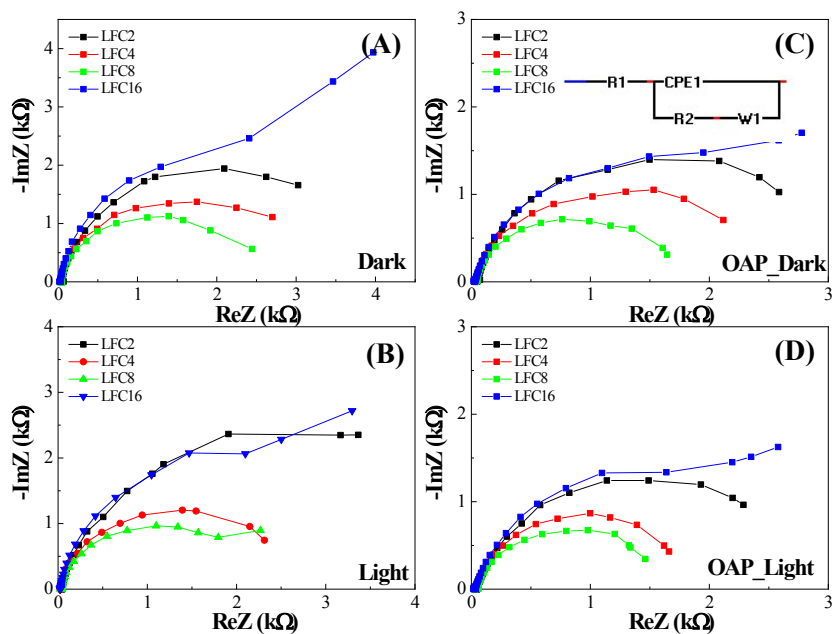

**Figure S8.** Nyquist plot of LaFeO<sub>3</sub> in (A, and B) absence and (C, and D) presence of 0.5 mM OAP in 0.1 M Na<sub>2</sub>SO<sub>4</sub> at E<sub>DC</sub> = 0.5 V vs. Ag/AgCl, E<sub>AC</sub> = 10 mV (peak to peak) and frequency range of 100 kHz to 3 Hz.

**Table S8.** Electrochemical impedance analysis of LaFeO<sub>3</sub> samples.

|                              | LFC2 |       |          |               | LFC4 |       |          |           | LFC8 |       |          |           | LFC16 |       |          |           |
|------------------------------|------|-------|----------|---------------|------|-------|----------|-----------|------|-------|----------|-----------|-------|-------|----------|-----------|
|                              | Dark | Light | OAP Dark | OAP Light     | Dark | Light | OAP Dark | OAP Light | Dark | Light | OAP Dark | OAP Light | Dark  | Light | OAP Dark | OAP Light |
| <b>R1</b><br>(Ω)             | 28   | 30    | 40       | 35            | 24   | 23    | 23       | 21        | 26   | 28    | 33       | 40        | 20    | 24    | 23       | 20        |
| <b>R2</b><br>(kΩ)            | 4    | 4     | 3.1      | 2.75          | 3.1  | 2.6   | 2.1      | 1.85      | 2.45 | 2.1   | 1.6      | 1.5       | 3.2   | 4.4   | 2.7      | 2.6       |
| <b>W</b> (Ωs <sup>-1</sup> ) | 17   | 80    | 3        | 22            | 17   | 9     | 25       | 20        | 13   | 9     | 13       | 8         | 185   | 60    | 70       | 60        |
| <b>P1</b> (μF)               | 0.02 | 0.01  | 0.016    | 0.07,<br>.013 | 0.02 | 0.018 | 0.02     | 0.02      | 0.02 | 0.018 | 0.014    | 0.018     | 0.013 | 0.02  | 0.012    | 0.012     |
| <b>n1</b>                    | 0.93 | 0.9   | 0.93     | 0.88          | 0.93 | 0.93  | 0.91     | 0.89      | 0.93 | 0.93  | 0.9      | 0.89      | 0.97  | 0.93  | 0.91     | 0.9       |

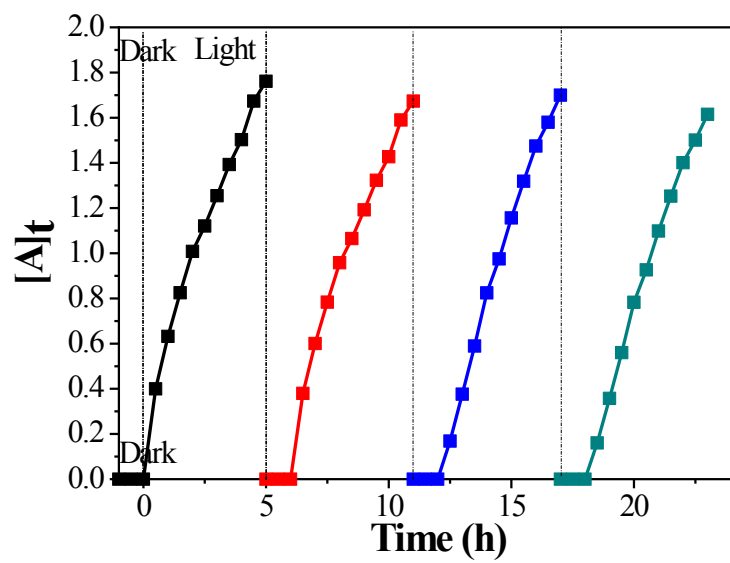

**Figure S9.** Reusability of LFC4 for photocatalytic conversion of OAP in acetonitrile/water under nitrogen atmosphere.
